# Supplementary material
Source: PubMed Central journal article supplement (PMC7057315)
Supplement: CJN.08430719SupplementaryData.pdf [file CJN.08430719SupplementaryData.pdf]

*Supplemental material is neither peer-reviewed nor thoroughly edited by CJASN. The authors alone are responsible for the accuracy and presentation of the material.*

## **Life course socioeconomic status, allostatic load, and kidney health in Black Americans**

### **Supplemental File**

#### **Table of Contents**

Supplemental Table 1: Baseline characteristics of participants in the Jackson Heart Study stratified by inclusion status.

Supplemental Table 2: Baseline characteristics of participants in the Jackson Heart Study stratified by tertiles of allostatic load

Supplemental Table 3: Association of allostatic load with kidney outcomes with additional adjustment for diet, physical activity, and sleep in the Jackson Heart Study

Supplemental Table 4: Direct and mediated (*via* allostatic load) associations of cumulative lifetime socioeconomic status with kidney outcomes after additional adjustment for diet, physical activity, and sleep pattern

Supplemental Table 5: Direct and mediated (*via* allostatic load) associations of different measures of socioeconomic status with kidney outcomes

Supplemental Figure 1: Direct and mediated (*via* allostatic load) associations of cumulative lifetime socioeconomic status with kidney outcomes.

**Supplemental Table 1: Baseline characteristics of Jackson Heart Study participants stratified by inclusion status**

| <b>Baseline characteristics*</b>                                                                                                     | <b>Overall<br/>N=5306</b> | <b>Excluded<br/>N=1885</b> | <b>Included<br/>N=3421</b> |
|--------------------------------------------------------------------------------------------------------------------------------------|---------------------------|----------------------------|----------------------------|
| Cumulative lifetime socioeconomic status                                                                                             |                           |                            |                            |
| Lowest tertile                                                                                                                       | 1767 (33)                 | 735 (39)                   | 1032 (30)                  |
| Middle tertile                                                                                                                       | 1766 (33)                 | 594 (32)                   | 1172 (34)                  |
| Highest tertile                                                                                                                      | 1770 (33)                 | 553 (29)                   | 1217 (36)                  |
| <b>Demographics</b>                                                                                                                  |                           |                            |                            |
| Age, years                                                                                                                           | 55 ± 13                   | 56 ± 12                    | 55 ± 13                    |
| Sex: male                                                                                                                            | 1935 (37)                 | 659 (35)                   | 1276 (37)                  |
| Annual Income***                                                                                                                     | 43 ± 30                   | 40 ± 29                    | 45 ± 30                    |
| Education: ≤12 <sup>th</sup> grade                                                                                                   | 2028 (38)                 | 800 (42)                   | 1228 (36)                  |
| <b>Behavioral factors</b>                                                                                                            |                           |                            |                            |
| Current/former smoker                                                                                                                | 1716 (32)                 | 687 (36)                   | 1029 (30)                  |
| Use of routine care                                                                                                                  | 3821 (72)                 | 1350 (72)                  | 2471 (72)                  |
| <b>Comorbidities</b>                                                                                                                 |                           |                            |                            |
| Diabetes                                                                                                                             | 1145 (22)                 | 414 (22)                   | 731 (21)                   |
| Diabetes medication                                                                                                                  | 747 (14)                  | 260 (14)                   | 487 (14)                   |
| Hypertension                                                                                                                         | 2996 (57)                 | 1060 (56)                  | 1936 (57)                  |
| BP lowering medication                                                                                                               | 2508 (47)                 | 844 (45)                   | 1664 (49)                  |
| Cardiovascular disease                                                                                                               | 572 (11)                  | 203 (11)                   | 369 (11)                   |
| <b>Baseline kidney function</b>                                                                                                      |                           |                            |                            |
| eGFR, ml/min/1.73 m <sup>2</sup>                                                                                                     | 94 ± 22                   | 96 ± 18                    | 93 ± 24                    |
| UACR, median [IQR], mg/g                                                                                                             | 6 [4-13]                  | 7 [5-9]                    | 6 [4-13]                   |
| Prevalent CKD                                                                                                                        | 673 (13)                  | 0 (0)                      | 673 (20)                   |
| <b>Allostatic load</b>                                                                                                               |                           |                            |                            |
| Composite z score****                                                                                                                | 0 ± 0.4                   | 0 ± 0.5                    | 0 ± 0.4                    |
| <b>Biologic components</b>                                                                                                           |                           |                            |                            |
| Cortisol, mmol/L                                                                                                                     | 9.9 ± 4.1                 | 10.3 ± 4.2                 | 9.6 ± 4                    |
| HBA1c, %                                                                                                                             | 6 ± 1.3                   | 6 ± 1.4                    | 6 ± 1.2                    |
| LDL cholesterol, mg/dl                                                                                                               | 126 ± 37                  | 126 ± 37                   | 126 ± 37                   |
| HDL cholesterol, mg/dl                                                                                                               | 52 ± 15                   | 53 ± 15                    | 51 ± 14                    |
| Total cholesterol, mg/dl                                                                                                             | 199 ± 40                  | 200 ± 40                   | 198 ± 40                   |
| Waist circumference, cm                                                                                                              | 101 ± 16                  | 101 ± 16                   | 101 ± 16                   |
| Systolic BP, mmHg                                                                                                                    | 128 ± 17                  | 129 ± 17                   | 127 ± 17                   |
| Diastolic BP, mmHg                                                                                                                   | 76 ± 9                    | 75 ± 9                     | 76 ± 9                     |
| Resting heart rate, bpm                                                                                                              | 65 ± 11                   | 65 ± 11                    | 65 ± 11                    |
| CRP, median [IQR], mg/dl                                                                                                             | 0.3 [0.1-0.6]             | 0.3 [0.1-0.6]              | 0.3 [0.1-0.6]              |
| WBC, 1000 cells/cmm                                                                                                                  | 5.6 ± 2.1                 | 5.6 ± 1.8                  | 5.6 ± 2.2                  |
| UACR, urine albumin-to-creatinine ratio; BP, blood pressure; bpm, beats per minute; CRP, c-reactive protein; WBC, white blood cells. |                           |                            |                            |
| *Values are n (%) or mean ±SD, unless stated otherwise                                                                               |                           |                            |                            |
| **Composite of childhood socioeconomic status, education attainment, and annual family income.                                       |                           |                            |                            |
| ***Annual family income scaled in USD 1000                                                                                           |                           |                            |                            |

Supplemental material is neither peer-reviewed nor thoroughly edited by CJASN. The authors alone are responsible for the accuracy and presentation of the material.

\*\*\*Men and women had separate z score for waist circumference; we multiplied the HDL z score by -1.

**Supplemental Table 2: Baseline characteristics of participants in the Jackson Heart Study stratified by tertiles of allostatic load**

| Baseline characteristics                                                                  | Overall     | Allostatic load, tertiles |             |             |
|-------------------------------------------------------------------------------------------|-------------|---------------------------|-------------|-------------|
|                                                                                           |             | Lowest                    | Middle      | Highest     |
| No. of participants (%)                                                                   | 5305        | 1768 (33)                 | 1768 (33)   | 1769 (33)   |
| Allostatic load range                                                                     | -1.1 to 6.7 | -1.1 to 6.7               | -1.1 to 2.3 | -1.1 to 2.9 |
| Socioeconomic status measures                                                             |             |                           |             |             |
| Cumulative lifetime                                                                       | -0.01 ±0.8  | 0.14 ±0.75                | 0 ±0.81     | -0.15 ±0.79 |
| Childhood                                                                                 | 4.77 ±2.98  | 5.21 ±2.93                | 4.68 ±2.97  | 4.4 ±2.97   |
| Perceived                                                                                 | 6.29 ±2.21  | 6.3 ±2.15                 | 6.33 ±2.24  | 6.23 ±2.23  |
| <b>Demographics</b>                                                                       |             |                           |             |             |
| Age, years                                                                                | 55 ±13      | 53 ±13                    | 56 ±13      | 57 ±12      |
| Sex: male                                                                                 | 1935 (37)   | 495 (28)                  | 690 (39)    | 750 (42)    |
| Annual Income*                                                                            | 43 ±29.7    | 46.3 ±30.1                | 44.7 ±30.2  | 38.1 ±28.2  |
| Education: ≤12 <sup>th</sup> grade                                                        | 2028 (38)   | 550 (31)                  | 676 (38)    | 802 (45)    |
| <b>Behavioral factors</b>                                                                 |             |                           |             |             |
| Current/former smoker                                                                     | 1715 (32)   | 485 (27)                  | 576 (33)    | 654 (37)    |
| Use of routine care                                                                       | 3820 (72)   | 1242 (70)                 | 1300 (74)   | 1278 (72)   |
| <b>Comorbidities</b>                                                                      |             |                           |             |             |
| Diabetes                                                                                  | 1145 (22)   | 172 (10)                  | 347 (20)    | 626 (35)    |
| Hypertension                                                                              | 2996 (57)   | 703 (40)                  | 1017 (58)   | 1276 (72)   |
| Cardiovascular disease                                                                    | 572 (11)    | 137 (8)                   | 188 (11)    | 247 (14)    |
| <b>Baseline kidney function</b>                                                           |             |                           |             |             |
| eGFR, ml/min/1.73 m <sup>2</sup>                                                          | 94 ±22      | 98 ±20                    | 94 ±21      | 91 ±24      |
| Urine UACR, median [IQR], mg/g                                                            | 6 [4 to 13] | 5 [4 to 9]                | 6 [4 to 11] | 9 [5 to 26] |
| Prevalent CKD                                                                             | 672 (20)    | 128 (11)                  | 186 (16)    | 358 (33)    |
| Values are n (%) or mean ±SD, unless stated otherwise; UACR, albumin-to-creatinine ratio. |             |                           |             |             |
| *Annual family income scaled in USD 1000                                                  |             |                           |             |             |

Supplemental material is neither peer-reviewed nor thoroughly edited by CJASN. The authors alone are responsible for the accuracy and presentation of the material.

**Supplemental Table 3: Association of allostatic load with kidney outcomes with additional adjustment for diet, physical activity, and sleep in the Jackson Heart Study**

| Models                                                                                                                                                                                                                                                                                                                                                                                                                               | Prevalent CKD<br>Odds ratio (95% CI) | Incident CKD<br>Odds ratio (95% CI) | eGFR decline<br>$\beta$ (95% CI) |
|--------------------------------------------------------------------------------------------------------------------------------------------------------------------------------------------------------------------------------------------------------------------------------------------------------------------------------------------------------------------------------------------------------------------------------------|--------------------------------------|-------------------------------------|----------------------------------|
| No. of CKD events/ <i>N</i> or <i>N</i>                                                                                                                                                                                                                                                                                                                                                                                              | 593/3010                             | 225/1817                            | 2153                             |
| <b>Allostatic load*</b>                                                                                                                                                                                                                                                                                                                                                                                                              |                                      |                                     |                                  |
| Model 1                                                                                                                                                                                                                                                                                                                                                                                                                              | 1.89 (1.73, 2.07)                    | 1.46 (1.29, 1.65)                   | 0.20 (0.13, 0.26)                |
| Model 2                                                                                                                                                                                                                                                                                                                                                                                                                              | 1.83 (1.66, 2.03)                    | 1.40 (1.21, 1.61)                   | 0.12 (0.04, 0.20)                |
| Model 3                                                                                                                                                                                                                                                                                                                                                                                                                              | NA                                   | 1.41 (1.21, 1.61)                   | 0.06 (-0.02, 0.14)               |
| <p>*Estimates are per 1 SD higher allostatic load; CI, confidence interval; NA, not applicable<br/>           Model 1: unadjusted<br/>           Model 2: adjusted for age, sex, use of routine care, smoking status, diet, physical activity, sleep, and cardiovascular disease<br/>           Model 3: adjusted for baseline eGFR; the eGFR decline model additionally adjusted for baseline urine albumin-to-creatinine ratio</p> |                                      |                                     |                                  |

Supplemental material is neither peer-reviewed nor thoroughly edited by CJASN. The authors alone are responsible for the accuracy and presentation of the material.

**Supplemental Table 4: Direct and mediated (*via* allostatic load) associations of cumulative lifetime socioeconomic status with kidney outcomes after additional adjustment for diet, physical activity, and sleep pattern**

|                                                                                                                                                                                                                                            | Prevalent CKD                     |                                        | Incident CKD                      |                                        | eGFR decline                           |                                             |
|--------------------------------------------------------------------------------------------------------------------------------------------------------------------------------------------------------------------------------------------|-----------------------------------|----------------------------------------|-----------------------------------|----------------------------------------|----------------------------------------|---------------------------------------------|
|                                                                                                                                                                                                                                            | Direct association<br>OR (95% CI) | Mediated<br>association<br>OR (95% CI) | Direct association<br>OR (95% CI) | Mediated<br>association<br>OR (95% CI) | Direct association<br>$\beta$ (95% CI) | Mediated<br>association<br>$\beta$ (95% CI) |
| No. of events                                                                                                                                                                                                                              | 593/3009                          |                                        | 225/1817                          |                                        | 2153                                   |                                             |
| CLSES*                                                                                                                                                                                                                                     | 1.17 (1.03, 1.33)                 | 1.08 (1.05, 1.12)                      | 0.95 (0.78, 1.15)                 | 1.03 (1.01, 1.06)                      | -0.01 (-0.12, 0.10)                    | 0.01 (0, 0.02)                              |
| CLSES Tertiles                                                                                                                                                                                                                             |                                   |                                        |                                   |                                        |                                        |                                             |
| Lowest                                                                                                                                                                                                                                     | 1.48 (1.15, 1.90)                 | 1.17 (1.1, 1.24)                       | 0.87 (0.60, 1.26)                 | 1.07 (1.01, 1.14)                      | -0.03 (-0.23, 0.17)                    | 0.01 (-0.01, 0.03)                          |
| Middle                                                                                                                                                                                                                                     | 1.26 (0.97, 1.63)                 | 1.08 (1.02, 1.13)                      | 0.82 (0.55, 1.21)                 | 1.04 (1.00, 1.09)                      | 0.05 (-0.14, 0.24)                     | 0.01 (0, 0.02)                              |
| Highest                                                                                                                                                                                                                                    | Reference                         | Reference                              | Reference                         | Reference                              | Reference                              | Reference                                   |
| OR, odds ratio; CI, confidence interval; CLSES, cumulative lifetime socioeconomic status                                                                                                                                                   |                                   |                                        |                                   |                                        |                                        |                                             |
| *Estimates are per 1 SD lower CLSES                                                                                                                                                                                                        |                                   |                                        |                                   |                                        |                                        |                                             |
| All models adjusted for age, sex, use of routine care, smoking status, diet, physical activity, sleep pattern, and cardiovascular disease; the eGFR decline model additionally adjusted for baseline albumin-to-creatinine ratio and eGFR. |                                   |                                        |                                   |                                        |                                        |                                             |

**Supplemental Table 5: Direct and mediated (*via* allostatic load) associations of different measures of socioeconomic status with kidney outcomes**

| SES measures*                                                                                                                                                                                      | Prevalent CKD                     |                                        | Incident CKD                      |                                        | eGFR decline                           |                                             |
|----------------------------------------------------------------------------------------------------------------------------------------------------------------------------------------------------|-----------------------------------|----------------------------------------|-----------------------------------|----------------------------------------|----------------------------------------|---------------------------------------------|
|                                                                                                                                                                                                    | Direct association<br>OR (95% CI) | Mediated<br>association<br>OR (95% CI) | Direct association<br>OR (95% CI) | Mediated<br>association<br>OR (95% CI) | Direct association<br>$\beta$ (95% CI) | Mediated<br>association<br>$\beta$ (95% CI) |
| Childhood SES                                                                                                                                                                                      | 0.98 (0.93, 1.02)                 | 1.00 (0.99, 1.01)                      | 0.96 (0.90, 1.03)                 | 1.00 (0.99, 1.01)                      | 0.03 (-0.01, 0.07)                     | 0.00 (0.00, 0.00)                           |
| Education                                                                                                                                                                                          | 1.05 (1.02, 1.07)                 | 1.01 (1.01, 1.02)                      | 1.00 (0.97, 1.04)                 | 1.01 (1.00, 1.01)                      | -0.01 (-0.03, 0.01)                    | 0.00 (0.00, 0.00)                           |
| Income                                                                                                                                                                                             | 1.08 (1.04, 1.12)                 | 1.03 (1.02, 1.04)                      | 1.05 (1.00, 1.10)                 | 1.01 (1.01, 1.02)                      | 0.00 (-0.02, 0.03)                     | 0.00 (0.00, 0.01)                           |
| Perceived SES                                                                                                                                                                                      | 0.99 (0.95, 1.03)                 | 1.01 (1.00, 1.02)                      | 1.04 (0.98, 1.11)                 | 1.00 (0.99, 1.01)                      | 0.03 (-0.01, 0.06)                     | 0.00 (0.00, 0.00)                           |
| OR, odds ratio; CI, confidence interval; SES, socioeconomic status; CLSES, cumulative lifetime SES                                                                                                 |                                   |                                        |                                   |                                        |                                        |                                             |
| *Estimates are per 1 score lower SES measure                                                                                                                                                       |                                   |                                        |                                   |                                        |                                        |                                             |
| All models adjusted for age, sex, use of routine care, smoking status, and cardiovascular disease; the eGFR decline model additionally adjusted for baseline albumin-to-creatinine ratio and eGFR. |                                   |                                        |                                   |                                        |                                        |                                             |

Supplemental material is neither peer-reviewed nor thoroughly edited by CJASN. The authors alone are responsible for the accuracy and presentation of the material.

**A.**

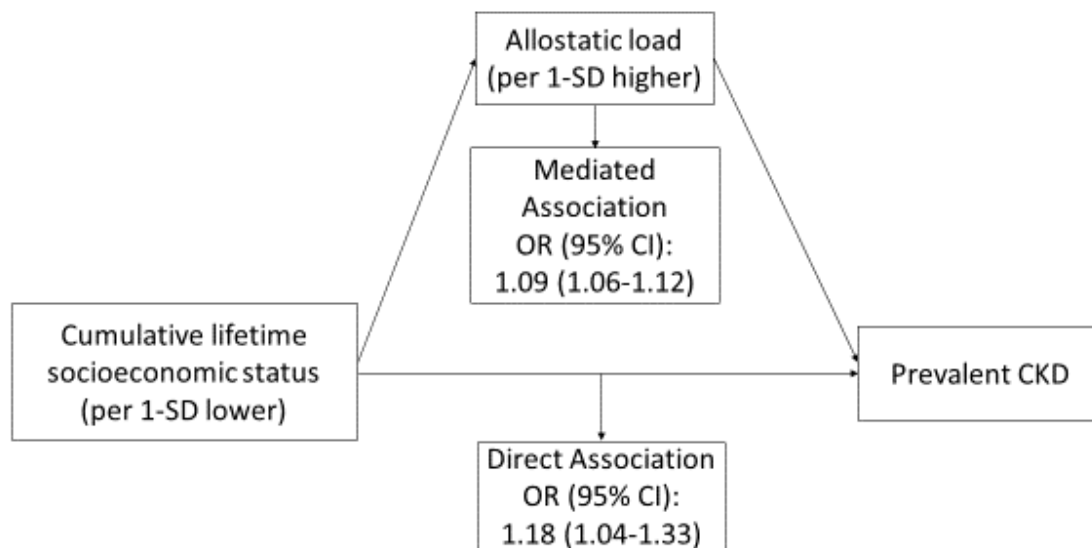

**B.**

Supplemental material is neither peer-reviewed nor thoroughly edited by CJASN. The authors alone are responsible for the accuracy and presentation of the material.

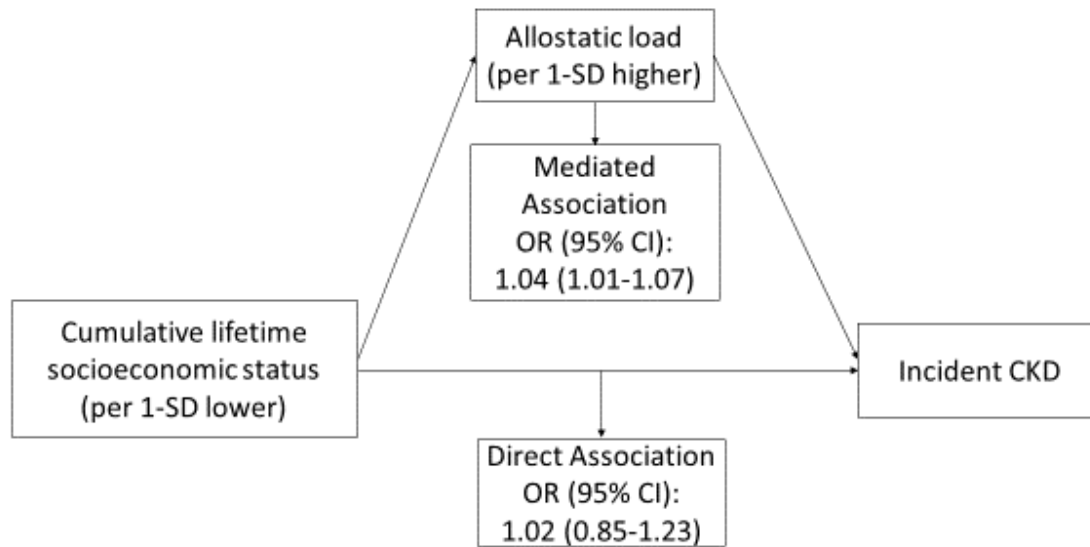

Supplemental material is neither peer-reviewed nor thoroughly edited by CJASN. The authors alone are responsible for the accuracy and presentation of the material.

C.

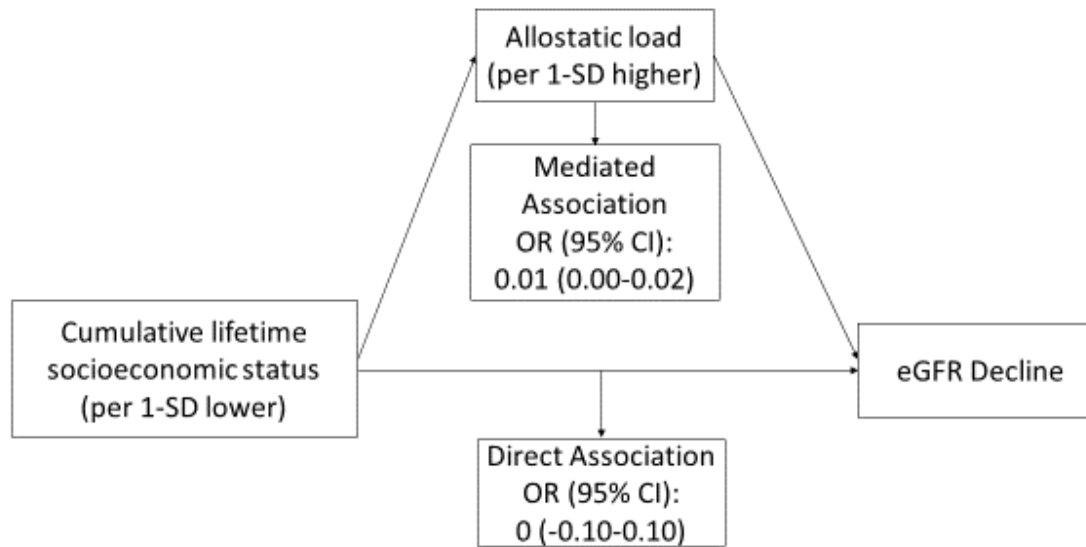

**Supplemental Figure 1:** Direct and mediated (via allostatic load) associations of cumulative lifetime socioeconomic status with kidney outcomes. A, Prevalent CKD; B, Incident CKD; C, eGFR Decline.



*Supplemental material is neither peer-reviewed nor thoroughly edited by CJASN. The authors alone are responsible for the accuracy and presentation of the material.*
